# Supplementary material for: A synbiotic concept containing spore-forming Bacillus strains and a prebiotic fiber blend consistently enhanced metabolic activity by modulation of the gut microbiome in vitro
Source: PubMed Central journal article supplement — Int J Pharm X. 2019 Jul 6;1:100021. doi: 10.1016/j.ijpx.2019.100021 (PMC6733369; doi:10.1016/j.ijpx.2019.100021), 2019-07-06

## SUPPLEMENTARY INFORMATION

### **A SYNBIOTIC CONCEPT CONTAINING SPORE-FORMING BACILLUS STRAINS AND A PREBIOTIC FIBER BLEND CONSISTENTLY ENHANCED METABOLIC ACTIVITY BY MODULATION OF THE GUT MICROBIOME IN VITRO**

Cindy Duysburgh<sup>1</sup>, Pieter Van den Abbeele<sup>1</sup>, Kiran Krishnan<sup>2</sup>, Thomas F. Bayne<sup>2</sup> and Massimo Marzorati<sup>1,3</sup>

<sup>1</sup> ProDigest bvba, Technologiepark 82, 9052 Ghent, Belgium; <sup>2</sup> Microbiome Labs, 1332 Waukegan Road, Glenview Illinois 60025, USA; <sup>3</sup> Center of Microbial Ecology and Technology (CMET), Ghent University, Coupure Links 653, 9000 Ghent, Belgium

Running title: Modulatory effect of novel synbiotic formulation in the human gut

\* Corresponding author: Massimo Marzorati, Phone: +3292411190, Fax: +3292411191, E-mail: [massimo.marzorati@prodigest.eu](mailto:massimo.marzorati@prodigest.eu)

**Figure S1. Microbial Metabolic Activity In Terms Of SCFA Production.** Average ( $\pm$  stdev) acetate (A-C; mM), propionate (D-F; mM) and butyrate (G-I; mM) production during the control (C1-C2; n = 3/donor) and the treatment (TR1-4; n = 3/donor) weeks in the ascending (AC), transverse (TC) and descending colon (DC) of the human gastro-intestinal tract for three donors tested. Statistically significant differences relative to the first control week are indicated with \* ( $p < 0.05$ ).

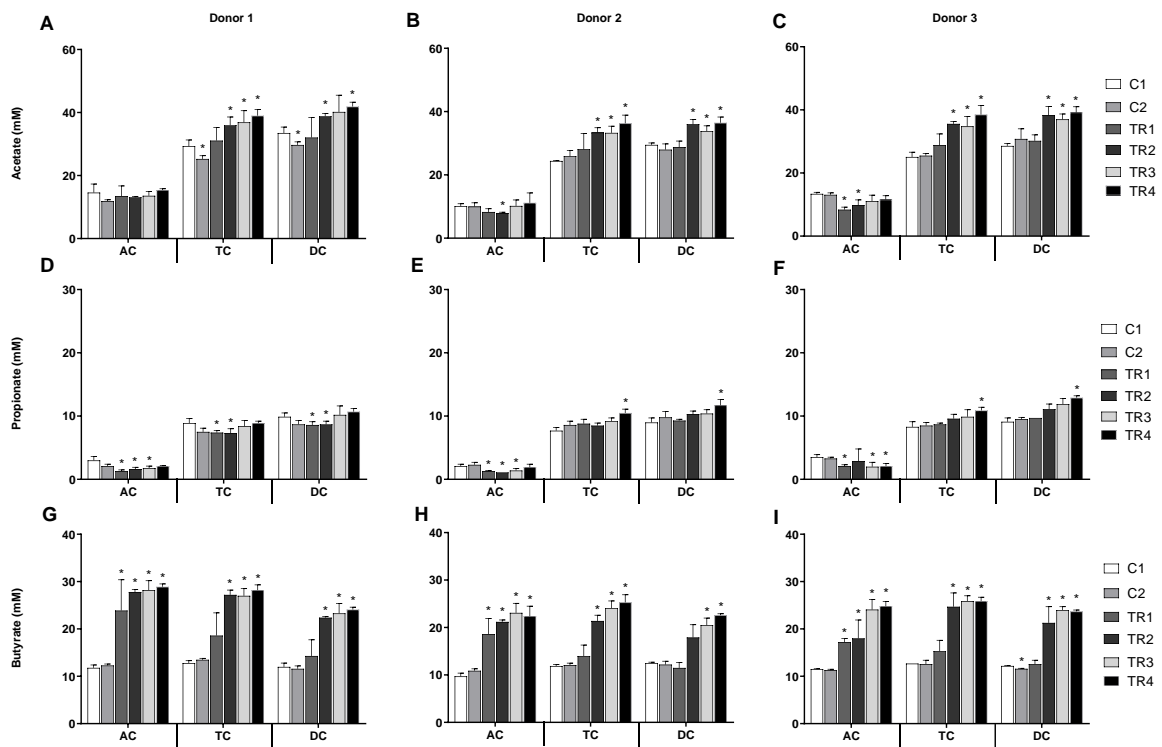

**Figure S2. Mucosal Microbial Community Composition As Assessed Via qPCR.** Average ( $\pm$  stdev) (A) *Bifidobacterium*, (B) *Lactobacillus*, (C) *Faecalibacterium prausnitzii* and (D) *Akkermansia muciniphila* levels (16S rRNA gene copies/g) over the entire control (C; n = 2/donor) and treatment (TR; n = 4/donor) period in the mucosal environment of the ascending (AC), transverse (TC) and descending colon (DC) of the human gastro-intestinal tract for three donors tested. For optimal observation of consistent effects over the different donors tested, the average of the three donors is presented (n = 6 for C; n = 12 for TR). Statistically significant differences between the control and treatment period are indicated with \* ( $p < 0.05$ ).

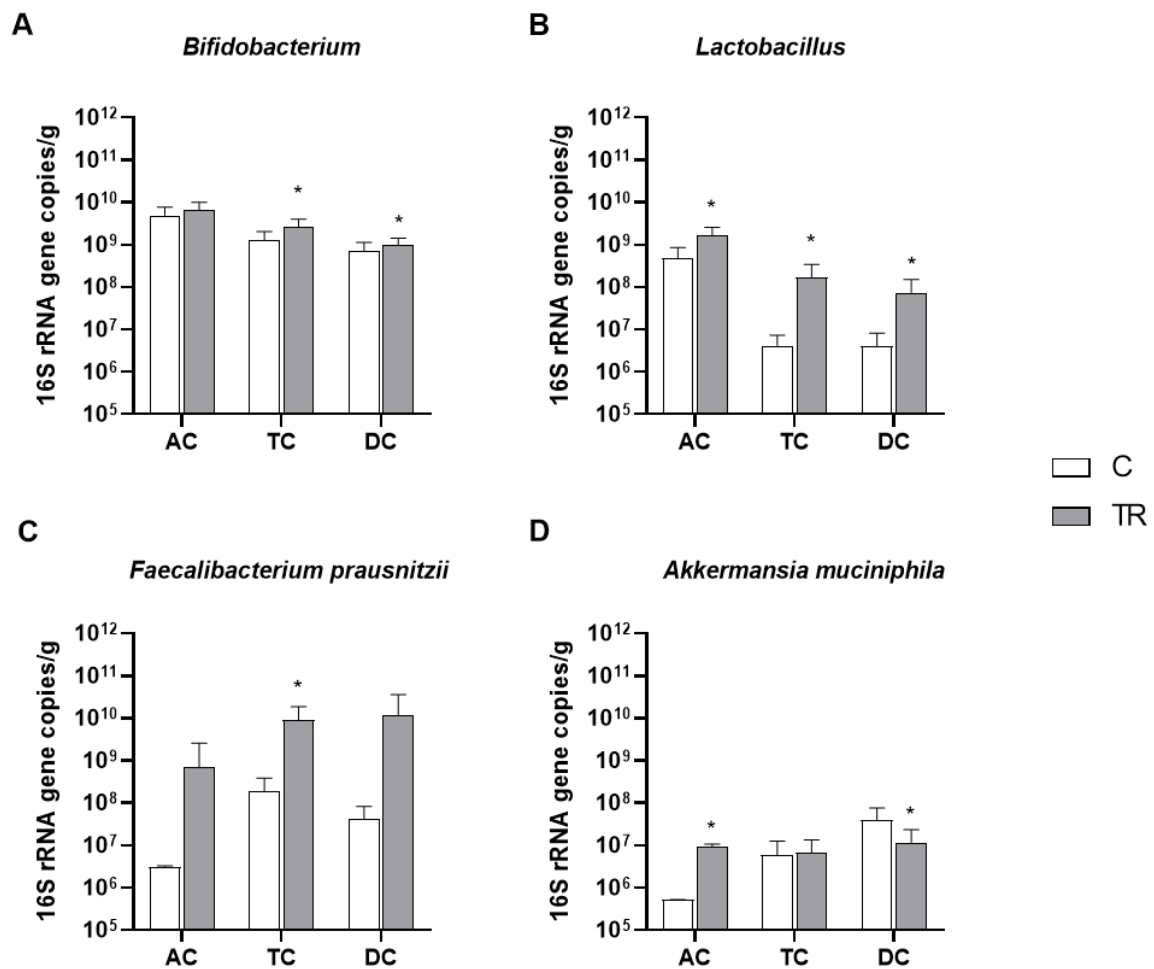

Supplement: mmc1.pdf [file mmc1.pdf]
